# Supplementary material for: Host JDP2 expression in the bone marrow contributes to metastatic spread
Source: PubMed Central journal article supplement (PMC4741961; doi:10.18632/oncotarget.5648), 2015-10-14
Supplement: oncotarget-06-37737-s001.pdf [file oncotarget-06-37737-s001.pdf]

## SUPPLEMENTARY FIGURES

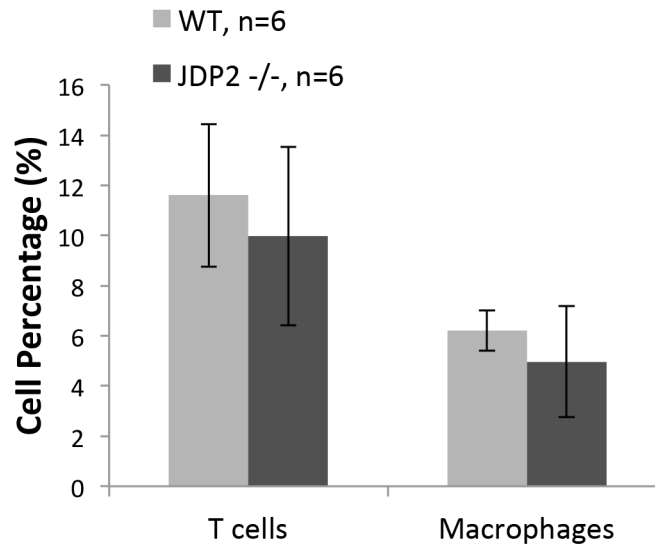

**Supplementary Figure S1: Percentage of T cells and macrophages in tumors of wild-type and JDP2<sup>-/-</sup> mice.** Six-to-eight week old wild-type and JDP2<sup>-/-</sup> mice were subcutaneously implanted with  $0.5 \times 10^6$  LLC cells. When tumors reached an average volume of  $2000 \text{ mm}^3$ , mice were sacrificed and tumors excised. Tumors were prepared as single cell suspensions and the percentage of T cells (CD3 $\epsilon$ ) and macrophages (F4/80) was determined by flow cytometry.

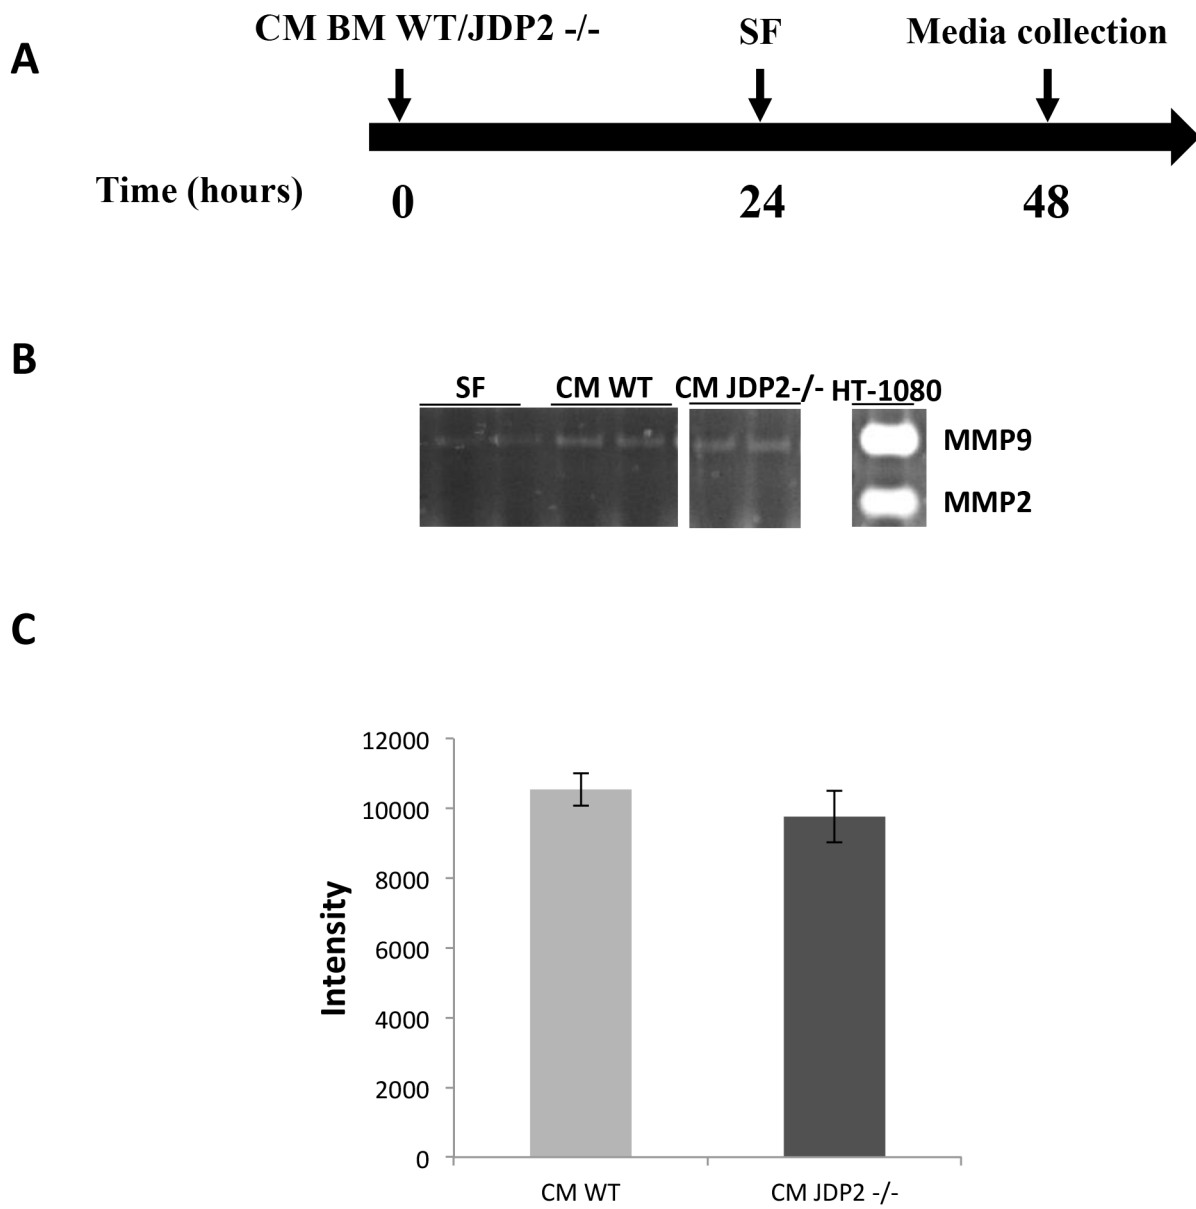

**Supplementary Figure S2: MMP9 secretion from LLC cells exposed to conditioned medium of wild-type and JDP2<sup>-/-</sup> BMDCs.** A. LLC cells were cultured in the presence of conditioned medium (CM) derived from wild-type or JDP2<sup>-/-</sup> BMDCs. After 24 h, the medium was replaced with serum-free (SF) medium, which was then collected 24 h afterwards. B–C. The activity of MMP9 in the CM was assessed by gelatin zymography. CM of HT-1080 was used as positive control (B), followed by densitometry (C)

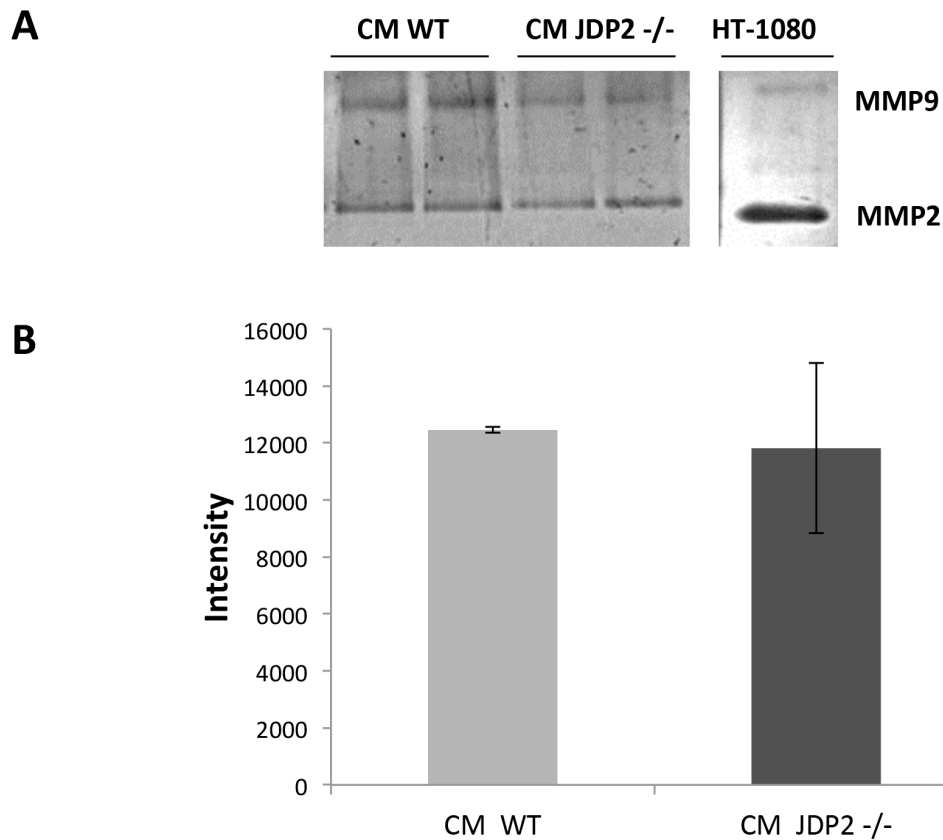

**Supplementary Figure S3: MMP9 secretion from wild-type and JDP2<sup>-/-</sup> BMDCs.** A–B. BMDCs derived from wild-type and JDP2<sup>-/-</sup> mice were cultured for 24 h and conditioned medium (CM) was collected. The activity of MMP9 in the CM was assessed by gelatin zymography. CM of HT-1080 was used as positive control (A), followed by densitometry (B)

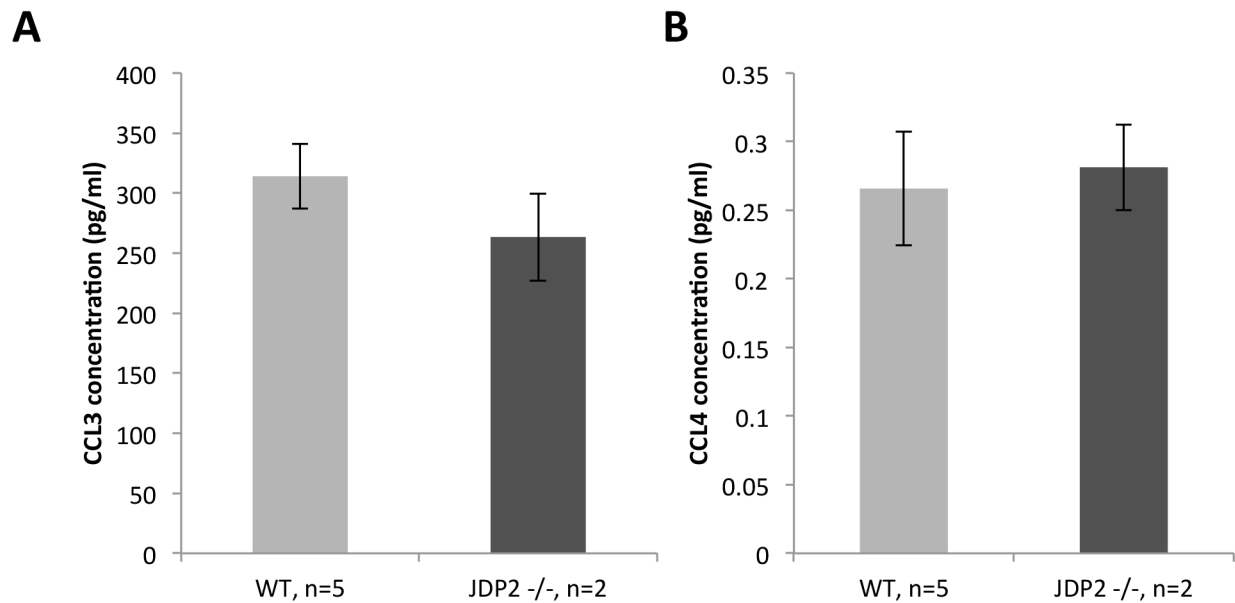

**Supplementary Figure S4: CCL3 and CCL4 secretion from wild-type and JDP2<sup>-/-</sup> BMDC cultures.** A–B. BMDCs derived from wild-type and JDP2<sup>-/-</sup> mice were cultured for 24 h and conditioned medium was collected. The level of secreted CCL3 (A) and CCL4 (B) in the conditioned medium was assessed by ELISA.

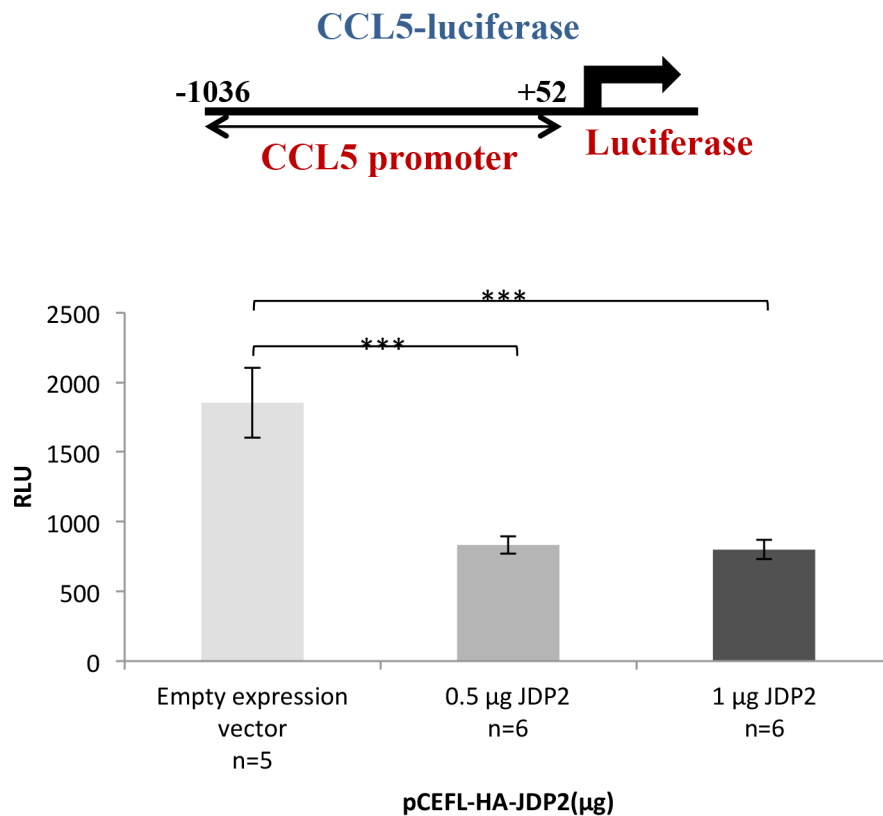

**Supplementary Figure S5: JDP2 suppresses CCL5 transcription.** HEK 293T cells were transfected with the CCL5-luciferase reporter plasmid in the presence or absence of pCEFL-HA-JDP2 expression plasmid. Luminescence was evaluated 24 h post transfection (B) Relative light unit (RLU) is indicated. \*\*\*,  $p < 0.001$  using one way ANOVA followed by Tukey post-hoc test.

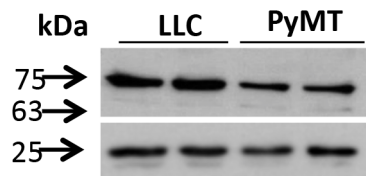

**Supplementary Figure S6: CCR5 is expressed in cancer cells.** Western blot analysis of cell lysate derived from LLC and PyMT cells probed with anti-CCR5 antibody. Anti-GAPDH serves as a loading control. The migration of the relevant proteins and molecular size markers are indicated by arrows.
